# Supplementary material
Source: Springer Nature journal article supplement (https://www.springermedizin.de/resource/supplementary/12893_2007_94_MOESM1_ESM.pdf/9512922)
Supplement: MOESM1 [file 9512922]

Inclusion

Patients with acute left-sided malignant colonic obstruction fulfilling the in-/exclusion criteria

Decline to participate

Randomization after informed consent (N=120)

Treatment

**Colonic stenting as bridge to elective surgery (N=60)**  
Dependent on tumor staging:  
a) Incurable disease; stent serves as palliative therapy  
b) Curable disease; elective surgery

**Emergency surgery (N=60)**  
In case of colostomie:  
a) Restoration of bowel continuity within 3-6 months if patient is fit enough  
b) No restoration if patient is not fit enough

Follow-up

Follow-up for 6 months

Analysis

Analysis on intention-to-treat basis, quality of life, morbidity and mortality
